# Supplementary material for: A new lead(ii) nanoporous three-dimensional coordination polymer: pore size effect on iodine adsorption affinity
Source: Royal Society of Chemistry journal article supplement (doi:10.1039/c4ce00454j), 2014-01-01
Supplement: c4ce00454j1.pdf [file c4ce00454j1.pdf]

**Electronic Supplementary Information for MS:**

**New lead(II) nano-porous three-dimensional coordination polymer;  
pore size effect on iodine adsorption affinity**

**Lida Hashemi, Ali Morsali\***

Department of Chemistry, Faculty of Sciences, Tarbiat Modares University, P.O. Box 14115-  
175, Tehran, Islamic Republic of Iran

**Table S1** Crystal data and structure refinement of [Pb(4-bpdb)( $\mu$ -NO<sub>3</sub>)( $\mu$ -SCN)]<sub>n</sub>.1.5 CH<sub>3</sub>OH (TMU-15).

|                                                     |                                                                         |
|-----------------------------------------------------|-------------------------------------------------------------------------|
| Identification code                                 | TMU-15                                                                  |
| Empirical formula                                   | C <sub>14.50</sub> H <sub>16</sub> N <sub>6</sub> O <sub>4.50</sub> PbS |
| Formula weight                                      | 585.58                                                                  |
| Temperature(K)                                      | 100(2)                                                                  |
| Wavelength                                          | 0.71073                                                                 |
| Crystal system                                      | Monoclinic                                                              |
| Space group                                         | C 2/c                                                                   |
| Unit cell dimensions                                | a = 31.684(4) Å                                                         |
|                                                     | b = 10.0017(12) Å                                                       |
|                                                     | c = 13.3763(17) Å                                                       |
|                                                     | $\alpha$ = 90.00                                                        |
|                                                     | $\beta$ = 106.607(3)°                                                   |
|                                                     | $\gamma$ = 90.00                                                        |
| Volume                                              | 4062.1(9) Å <sup>3</sup>                                                |
| Z                                                   | 8                                                                       |
| Density (calculated)                                | 1.915 Mg/m <sup>3</sup>                                                 |
| <i>F</i> (000)                                      | 2232                                                                    |
| Theta range for data collection                     | 2.55 to 29.83°                                                          |
| Index ranges                                        | -43 ≤ <i>h</i> ≤ 43                                                     |
|                                                     | -13 ≤ <i>k</i> ≤ 13                                                     |
|                                                     | -18 ≤ <i>l</i> ≤ 18                                                     |
| Reflections collected                               | 24504                                                                   |
| Independent reflections                             | 5776 [R(int) = 0.0575]                                                  |
| Absorption correction                               | Semi-empirical from equivalents                                         |
| Refinement method                                   | Full-matrix least-squares on <i>F</i> <sup>2</sup>                      |
| Data / restraints / parameters                      | 5776 / 0 / 257                                                          |
| Goodness-of-fit on <i>F</i> <sup>2</sup>            | 1.000                                                                   |
| Final <i>R</i> indices [ <i>I</i> > 2σ( <i>I</i> )] | <i>R</i> <sub>1</sub> = 0.0345, <i>wR</i> <sub>2</sub> = 0.0800         |
| <i>R</i> Indices (all data)                         | <i>R</i> <sub>1</sub> = 0.0524, <i>wR</i> <sub>2</sub> = 0.0885         |

**Table S2**

Hydrogen

bonding in [Pb(4-bpdb)( $\mu$ -NO<sub>3</sub>)( $\mu$ -SCN)]<sub>n</sub>.1.5 CH<sub>3</sub>OH (TMU-15).

| D-H...A             | d(D-H)           | d(H...A)               | d(D...A)         | <(DHA)           |
|---------------------|------------------|------------------------|------------------|------------------|
| O(4)-H(4O)...O(5)#5 | 0.84             | 2.08                   | 2.77(2)          | 138              |
| #1 -x+1/2,-y+1/2,-z | #2 x-1/2,y+1/2,z | #3 -x+1/2,y-1/2,-z+1/2 | #4 x+1/2,y-1/2,z | #5 -x+1,y,-z+1/2 |

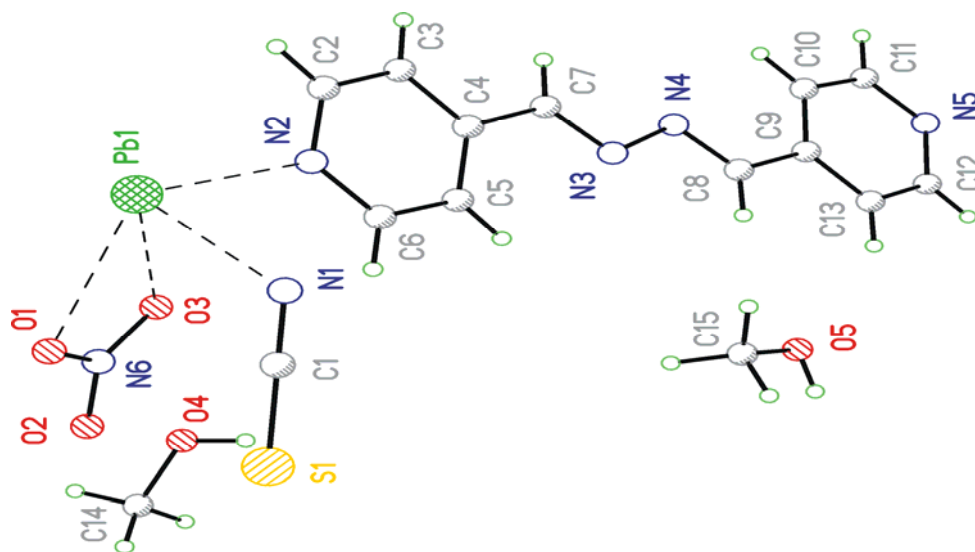

**Fig. S1.** Molecular view of independent part of unit cell

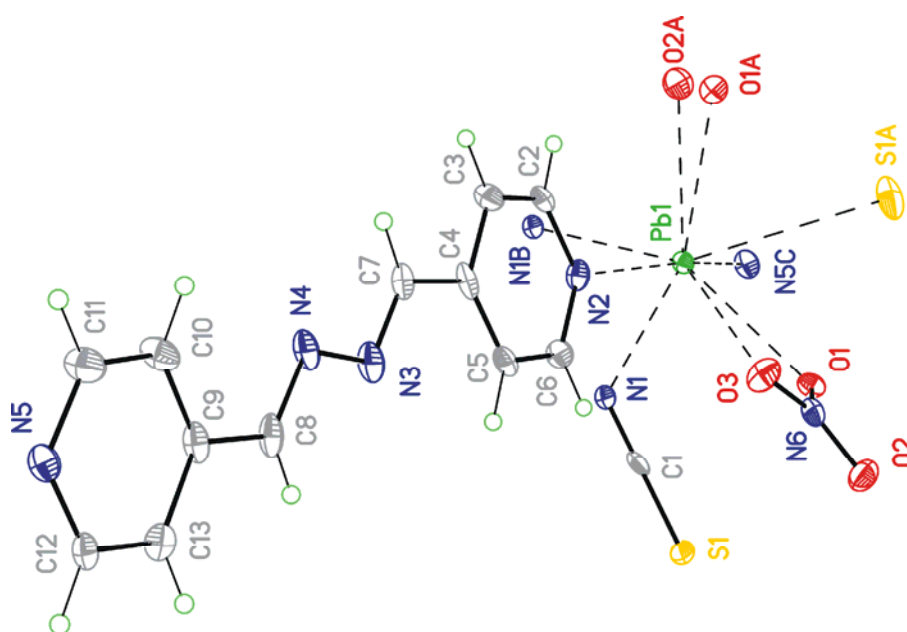

**Fig. S2.** Lead coordination environment given in thermal ellipsoids with 50% probability level. Symmetry transformations used to generate equivalent atoms: #A-x+1/2,y-1/2,-z+1/2 1Bx+1/2,-y+1/2,-z #C-1/2,y+1/2,z

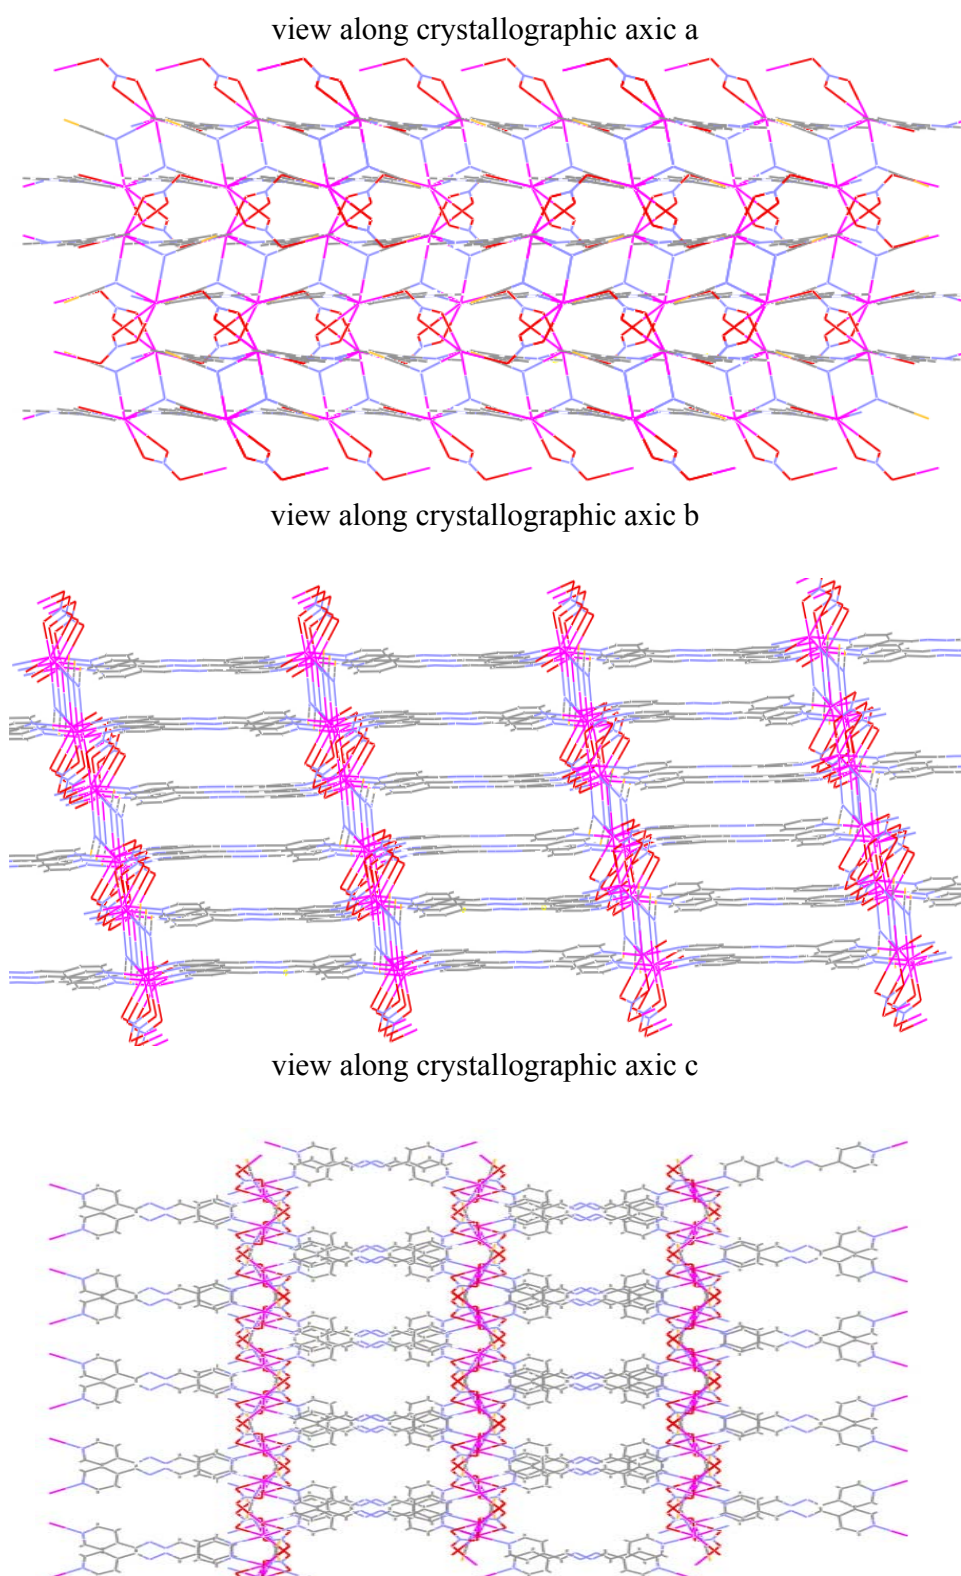

**Fig. S3.** A fragment of nano-porous 3D coordination polymer in  $[\text{Pb}(4\text{-bpdb})(\mu\text{-NO}_3)(\mu\text{-SCN})]_n \cdot 1.5 \text{CH}_3\text{OH}$  (**TMU-15**) (view along crystallographic axis a, b and c). The lead atoms are connected into infinite chains through the  $(\text{C}_{10}\text{H}_{10}\text{N}_4)$  ligands and the chains are further linked into MOF by  $\text{NO}_3^-$  and  $\text{SCN}^-$  anions.

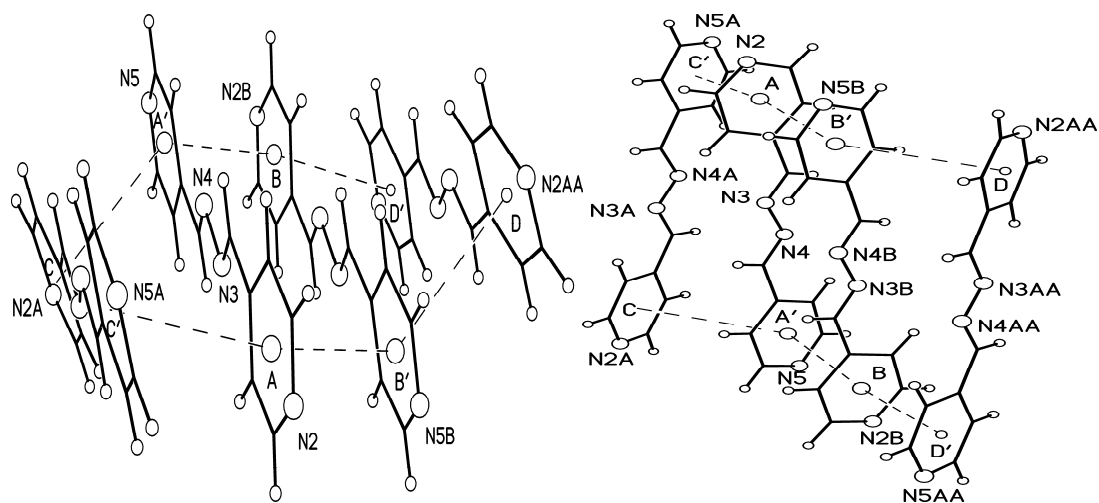

**Fig. S4.** Fragment of  $\pi$ -stacking ( $C_{10}H_{10}N_4$ ) ligands (the stacks are parallel with the crystallographic axis  $a$ ). The angle between the meanplanes of pyridine moieties and the distance between their centres for the pairs of cycles denoted A and B', B and D', A' and C are equal to, respectively,  $8.3^\circ$  and  $3.58\text{\AA}$ ; that for the A' and B, B' and D, A and C' cycles - to  $7.0^\circ$  and  $3.78\text{\AA}$ .

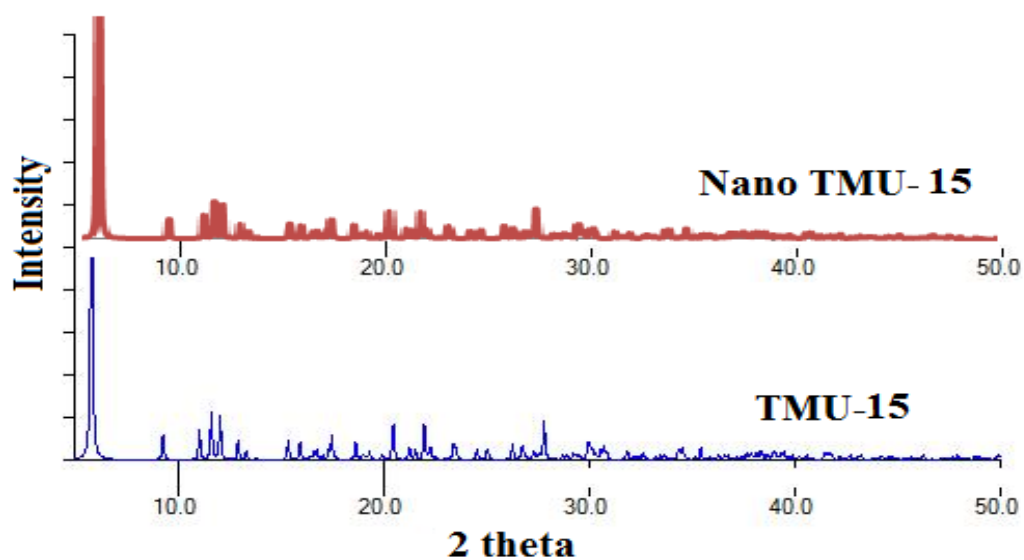

**Fig. S5.** XRD patterns of simulated based on single crystal data of compounds **TMU-15** and nano-**TMU-15** prepared by sonochemical process.

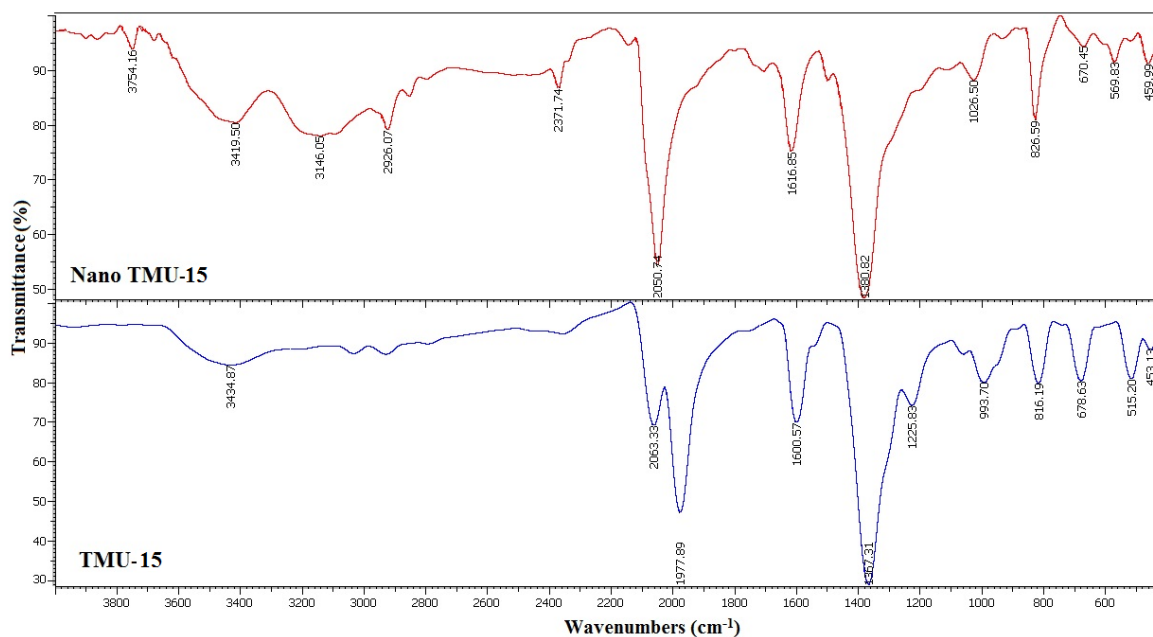

**Fig. S6.** The IR spectra of bulk materials as synthesized of compounds **TMU-15** and nano-sized compounds **TMU-15** prepared by sonochemical method.

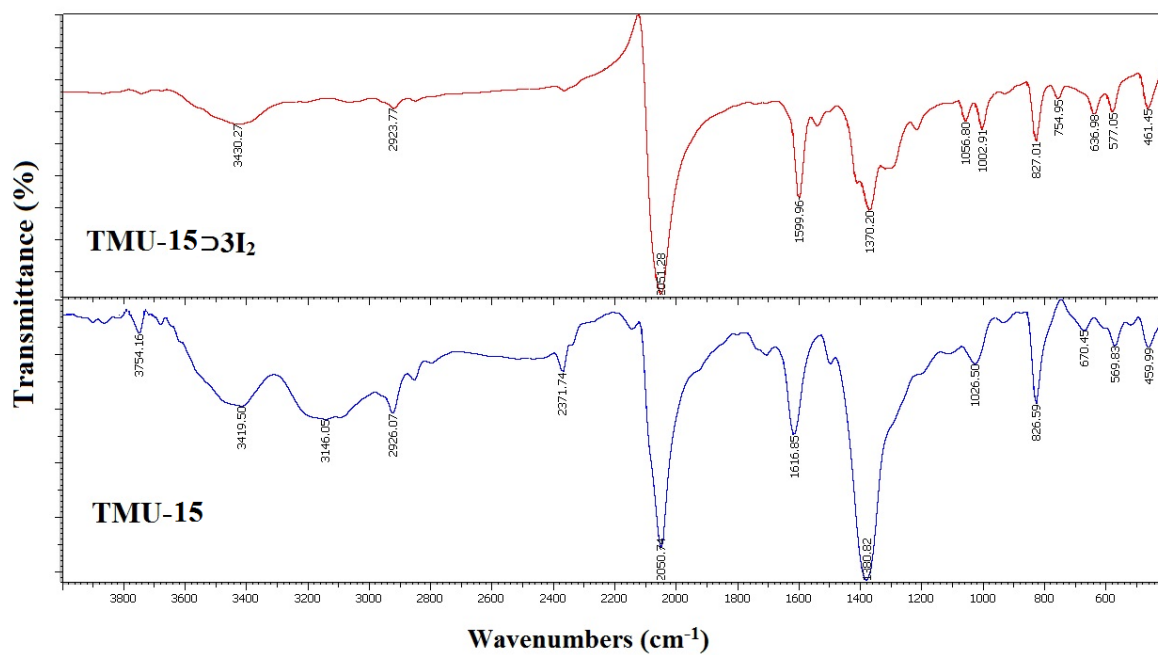

**Fig. S7.** The IR spectra of bulk materials as synthesized of compounds **TMU-15** and **TMU-15 $\supset$ 3I<sub>2</sub>**.

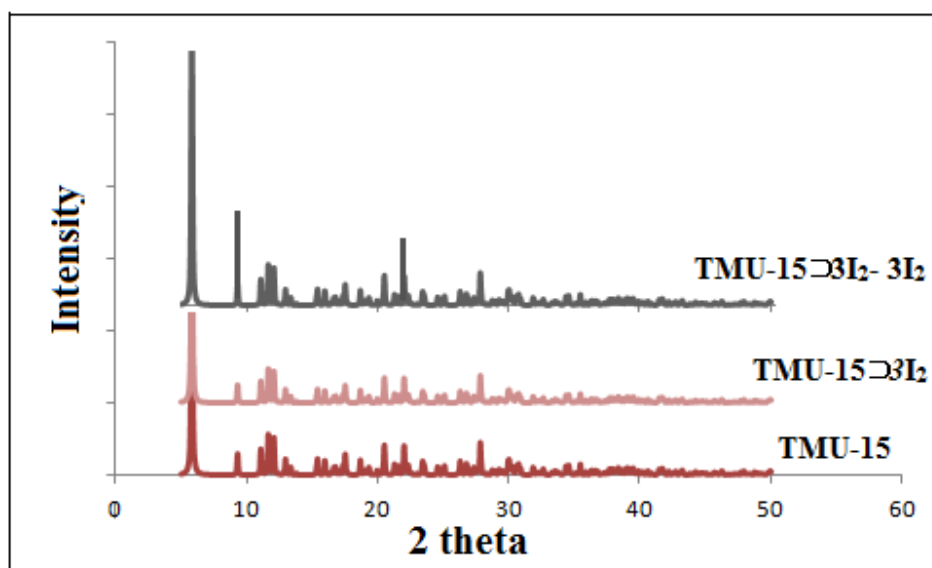

**Figure S8.** PXRD patterns of as-synthesized **TMU-15**, **TMU-15 $\supset$ 3I<sub>2</sub>** and **TMU-15 $\supset$ 3I<sub>2</sub>-3I<sub>2</sub>**.

Elemental analysis data for compound **TMU-15** after the first cycle of iodine adsorption and desorption:

**Compound TMU-15:** C, 29.65; H, 2.70; N, 14.35%.

**Compound TMU-15 after iodine adsorption (TMU-15 $\rightarrow$ 3I<sub>2</sub>):**

C, 12.91; H, 1.17; N, 6.24%.

**Compound TMU-15 after iodine desorption (TMU-15 $\rightarrow$ 3I<sub>2</sub>-3I<sub>2</sub>):**

C, 29.63; H, 2.68; N, 14.33%.
